# Supplementary material for: High-index facets and multidimensional hotspots in Au-decorated 24-faceted PbS for ultrasensitive and recyclable SERS substrates
Source: Royal Society of Chemistry journal article supplement (doi:10.1039/d1tc05009e), 2021-11-29
Supplement: d1tc05009e1.pdf [file d1tc05009e1.pdf]

**Supporting Information for**

**High-index Facets and Multidimensional  
Hotspots in Au-Decorated 24-faceted PbS for  
Ultrasensitive and Recyclable SERS  
Substrates**

*Hao-Sen Kang<sup>a</sup>, Ming-Yang Long<sup>a</sup>, Tao Zhou<sup>b</sup>, Jin-Chuang Liu<sup>a</sup>, Yi-Tong Duan<sup>a</sup>,*

*Liang Ma<sup>a\*</sup>, Xiang-Bai Chen<sup>a</sup>, Si-Jing Ding<sup>b\*</sup>, Li Zhou<sup>c\*</sup>*

<sup>a</sup> Hubei Key Laboratory of Optical Information and Pattern Recognition, Wuhan  
Institute of Technology, Wuhan, 430205, P. R. China.

<sup>b</sup> School of Mathematics and Physics, China University of Geosciences (Wuhan),  
Wuhan, 430074, P. R. China.

<sup>c</sup> Department of Physics, Wuhan University, Wuhan, 430072, P. R. China.

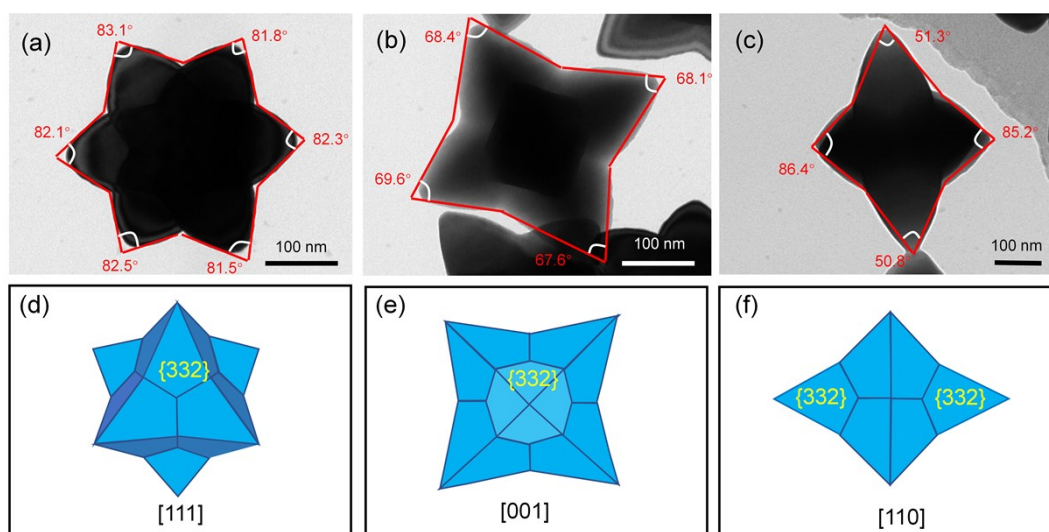

**Figure S1.** TEM images of the 24-faceted PbS at the [111] (a), [001] (b), and [110] (c) orientations. (d-f) The corresponding schematic motifs of PbS at different crystal orientations.

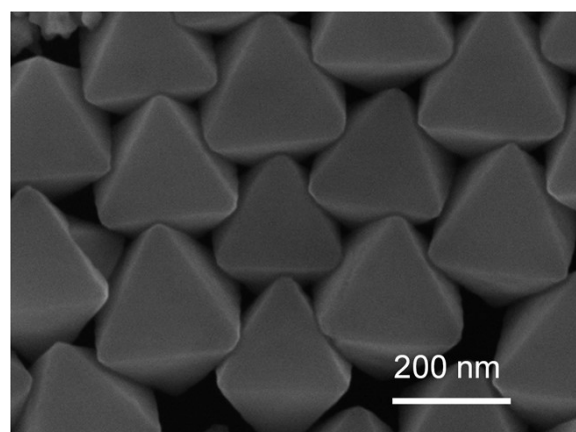

**Figure S2.** SEM image of 8-faceted PbS.

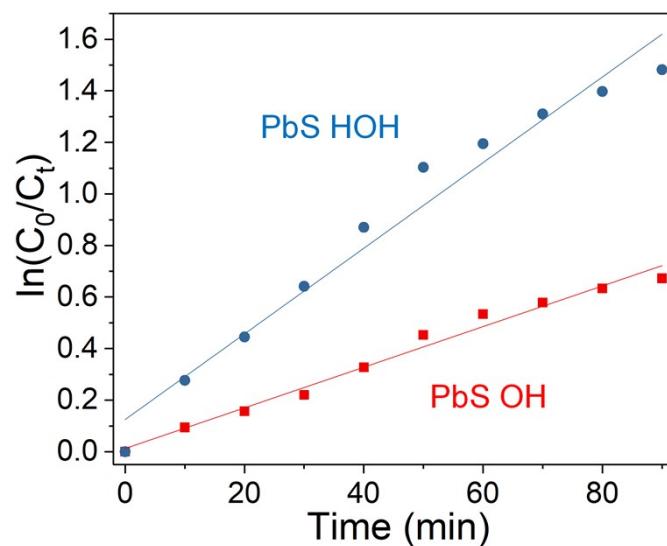

**Figure S3.** Logarithm of the absorption at 552 nm vs reaction time in the presence of 8- and 24- faceted PbS.

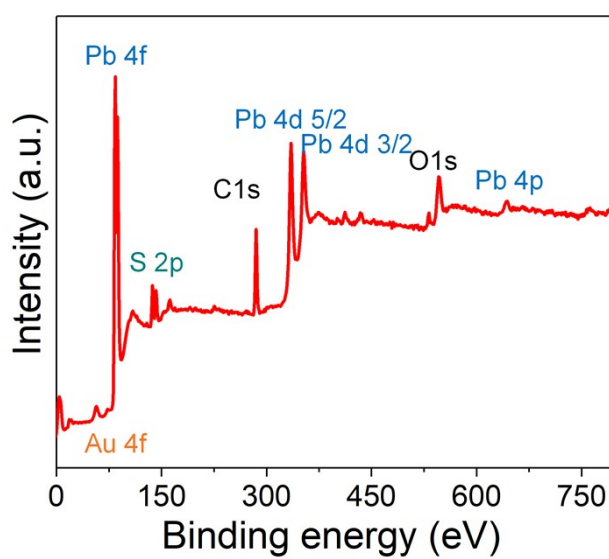

**Figure S4.** XPS survey of PbS-Au hybrids.

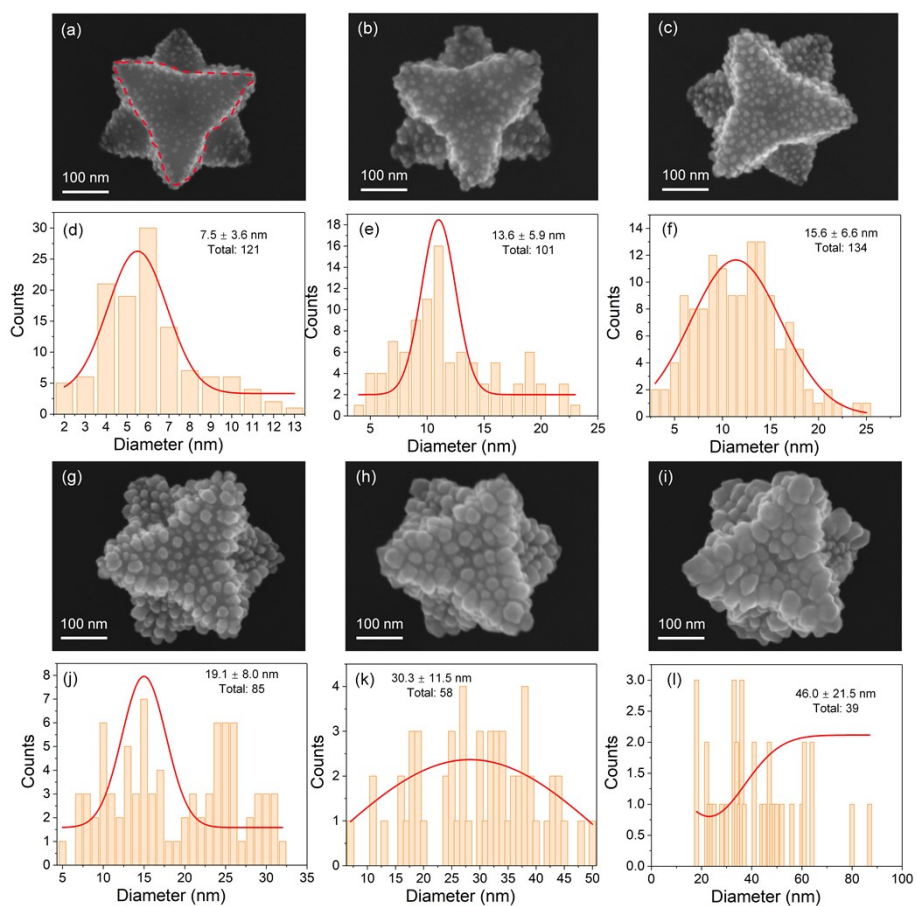

**Figure S5.** SEM images and size distributions of Au nanoparticles for PbS-Au hybrids prepared with adding 20 (a, d), 40 (b, e), 60 (c, d), 100 (g, j), 200 (h, k), 600 (i, l)  $\mu$ L of chloroauric acid.

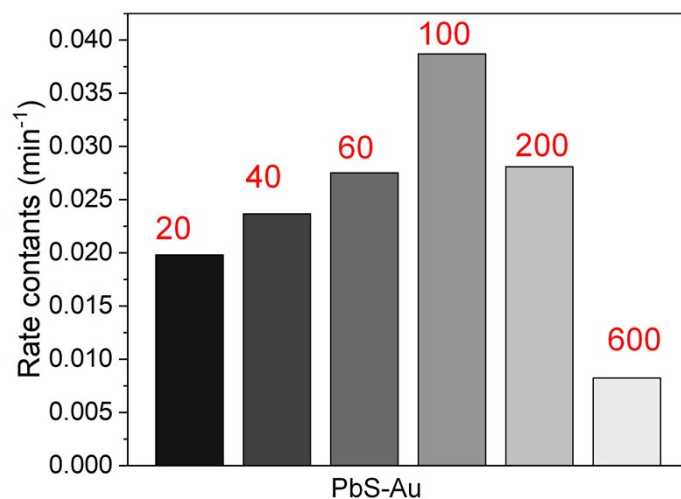

**Figure S6.** Comparison of photocatalytic activity of PbS-Au hybrids with loading different amount of Au nanoparticles.

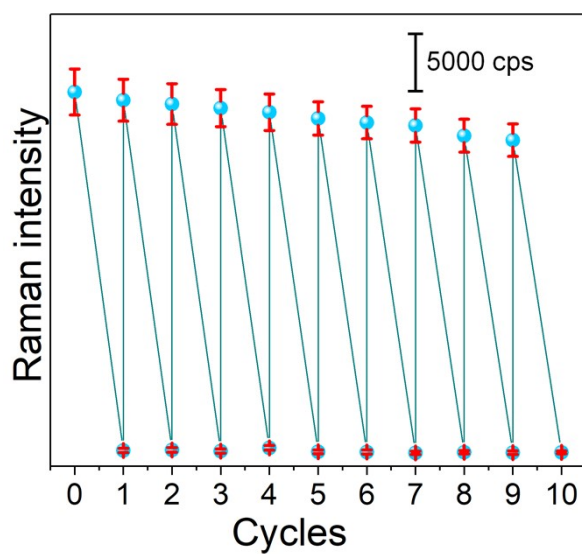

**Figure S7.** Raman intensities at 1647 cm<sup>-1</sup> of RhB during the 10 repeated measurements under visible light irradiation.

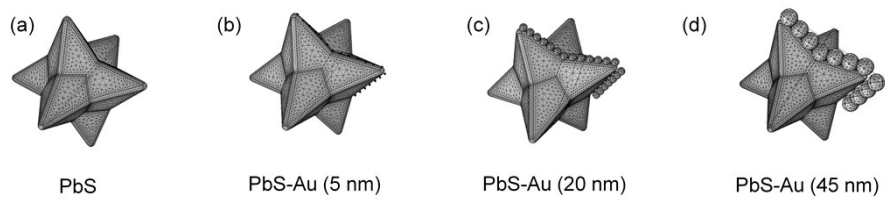

**Figure S8.** 3D models and meshes of 24-faceted PbS and PbS-Au hybrids with loading different size of Au nanoparticles.
